# Supplementary material
Source: publisher site journal article supplement (https://www.dovepress.com/get_supplementary_file.php?f=475656.docx)
Supplement: Supplementary file 1 [file get_supplementary_file.php]

Table S1. List of Abbreviations

| **ABBREVIATIONS** | **DETAILS** |
| --- | --- |
| **Ag-NPs** | Silver Nanoparticles |
| **AMR** | Anti-Microbial Resistance |
| **°C** | Degree Centigrade |
| **EDXA** | Energy-Dispersive X-Ray Spectroscopy Analysis |
| **FTIR** | Fourier-Transform Infrared Spectroscopy |
| **H** | Hours |
| **HCl** | Hydrochloric acid |
| **MDR** | Multidrug Resistance |
| **Mg** | Milligram |
| **MICs** | Minimum Inhibitory Concentration |
| **mL** | Milliliter |
| **mM** | Milli-Mole |
| **PBS** | Phosphate Buffer Saline |
| **OD** | Optical Density |
| **Rpm** | Revolution Per Minutes |
| **SDS** | Sodium Dodecyl Sulfate |
| **SEM** | Scanning Electron Microscopy |
| **µL** | Microliter |
| **UV–visible spectrophotometry** | Visible Ultra Violet Spectroscopy |
| **v/v** | Volume By Volume |
| **w/v** | Weight By Volume |
| **XRD** | X-Ray Diffraction |
| **ZOAE** | Aqueous Extract of *Z. officinale* |
| **ZOEE** | Organic Or Ethanol Extract of *Z. officinale* |
| **ZO-Ag-NPs** | Biosynthesized Silver Nanoparticles Using Extract of *Z. offocinale* |
| **ZOAE-Ag-NPs** | Synthesized Silver Nanoparticles Using Aqueous Extract of *Z. officinale* |
| **ZOEE-Ag-NPs** | Synthesized Silver Nanoparticles Using Organic Or Ethanol Extract of *Z. officinale* |
| **+** | Positive |
| **-** | Negative |

Table S2. EDX Result shows the percentage of element in ZOAE-AgNPs

| **Element** | **Line Type** | **Apparent Concentration** | **k Ratio** | **Wt%** | **Wt% Sigma** |
| --- | --- | --- | --- | --- | --- |
| C | K series | 1.86 | 0.01864 | 4.94 | 0.57 |
| O | K series | 0.93 | 0.00313 | 4.08 | 1.2 |
| Ag | L series | 42.57 | 0.4257 | 90.97 | 1.27 |
| Total: |  |  |  | 100 |  |
|  |  |  |  |  |  |

Table S3. EDX Result shows the percentage of element in ZOEE-AgNPs.

| **Element** | **Line Type** | **Apparent Concentration** | **k Ratio** | **Wt%** | **Wt% Sigma** |
| --- | --- | --- | --- | --- | --- |
| C | K series | 8.92 | 0.08919 | 21.42 | 0.69 |
| O | K series | 0.29 | 0.00098 | 1.23 | 1.24 |
| Ag | L series | 36.16 | 0.36162 | 77.34 | 1.16 |
| Total |  |  |  | 100 |  |


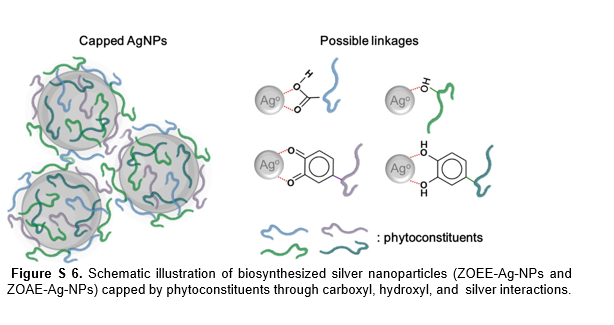


**Figure S1:** Schematic illustration of biosynthesized AgNPs capped by photoconstituents carboxyl, hydroxyl, and silver interactions.


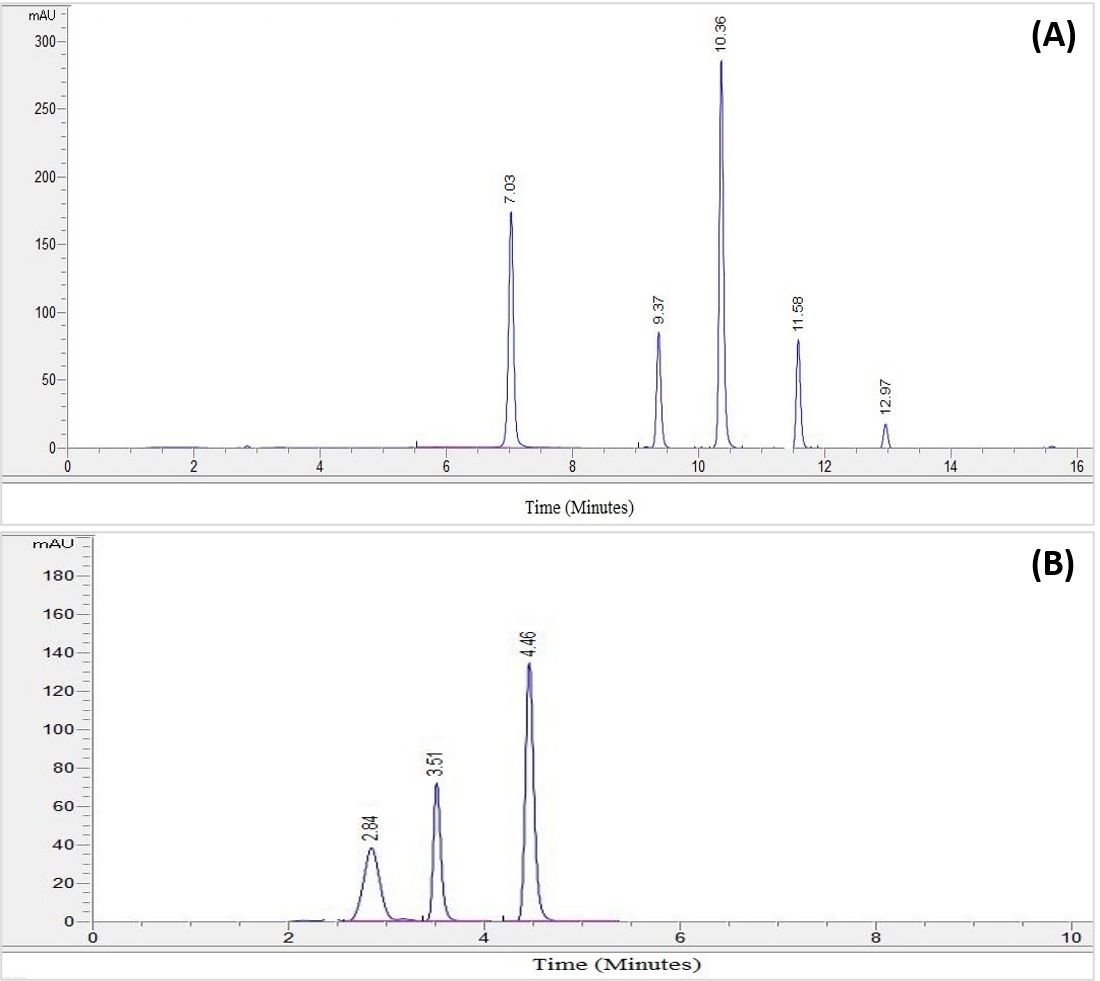


**Figure S2** (A) The chromatogram of the standard phenolic compounds. (B) The chromatogram of the standard flavonoid compounds

Key: AuU= absorbance unit, mAU- mili absorbance unit


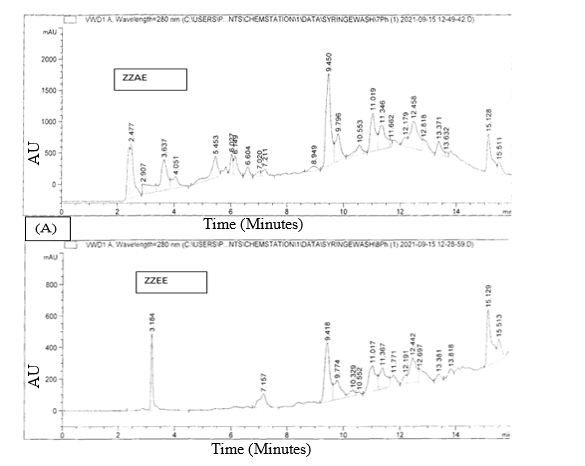


**Figure S3** The chromatogram of the phenolic and flavonoid compounds from *Z. officinale* (organic extract) detection at 280 nm and 360 nm respectively

**
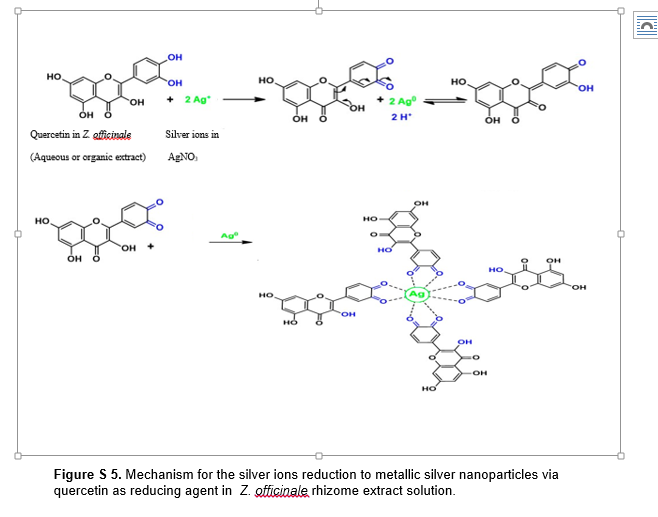
**

**Figure S4** Mechanism of the silver ions reduction to metallic AgNPs via quercitin as reducing agent in *Z. officinale* rhizome extract solution.

**Figure S5** Structure of phenolic constituents
